# Supplementary material for: The C-type lectin receptor DCIR senses galactose-terminated N-glycans on LRP1 to regulate myeloid cell function
Source: Research Square preprint supplement (doi:10.21203/rs.3.rs-7879894/v1), 2025-11-11
Supplement: Supplementary file 1 [file 39d56352191832c5b012a7e6.xlsx]

## Sheet: list_corrected SR
Table S7. Antibodies used for flow cytometry analysis
ANTIBODIES	SOURCE	IDENTIFIER
TruStain FcX™ (anti-mouse CD16/32) antibody	BioLegend	Cat#101320
LIVE/DEAD™ Fixable Blue Dead Cell Stain Kit	Thermo Fisher Scientific	Cat#L23105
BV711 anti-CD45.2 (clone 104)	BD Biosciences	Cat#563685
AF700 anti-Ly6G (clone 1A8)	BD Biosciences	Cat#561236
eFluor™ 450 anti-Ly6C (clone HK1.4)	Invitrogen	Cat#48-5932-82
BV650 anti-CD11b (clone M1/70)	BioLegend	Cat#101259
PE-Cy7 anti-CD11c (clone N418)	BioLegend	Cat#117318
APC/Cy7 anti-I-A/I-E (clone M5/114.15.2)	BioLegend	Cat#107628
PerCP/Cy5.5 anti-I-A/I-E (clone M5/114.15.2)	BioLegend	Cat#107626
BV786 anti-SiglecF (clone E50-2440)	BD Biosciences	Cat#740956
Alexa Fluor 647 anti-F4/80 (clone BM8)	BioLegend	Cat#123122
FITC anti-F4/80 (clone BM8)	BioLegend	Cat#123108
BV786 anti-CD4 (clone RM4-5)	BD Biosciences	Cat#563727
FITC anti-CD8a (clone 53-6.7)	BioLegend	Cat#100706
APC/Cy7 anti-CD8a (clone 53-6.7)	BioLegend	Cat#100714
PE-CF594 anti-TCRγδ (clone GL3)	BD Biosciences	Cat#563532
APC/Cy7 anti-TCRβ (clone H57-597)	BioLegend	Cat#109220
BV510 anti-NK1.1 (clone PK136)	BioLegend	Cat#108738
Pacific Blue anti-CD19 (clone 6D5)	BioLegend	Cat#115523
PE/Dazzle 594 anti-CD64 (clone X54-5/7.1)	BioLegend	Cat#139320
FITC anti-MerTK (clone 2B10C42)	BioLegend	Cat#151504
Alexa Fluor 647 anti-mDCIR1 (clone TKKT-1)	Laboratory of Naoki Matsumoto (Tokyo, Japan)
AF488 anti-LRP1 α-chain (clone A2MR alpha-2)	Novus	Cat#NB100-64808AF488
PE anti-LRP1 β-chain (clone EPR3724)	abcam	Cat#ab310941
PE Streptavidin (High Concentration)	BioLegend	Cat#405245
