# Supplementary material for: The C-type lectin receptor DCIR senses galactose-terminated N-glycans on LRP1 to regulate myeloid cell function
Source: Research Square preprint supplement (doi:10.21203/rs.3.rs-7879894/v1), 2025-11-11
Supplement: Supplementary file 2 [file 3eb70e30bc82813b939ca043.xlsx]

## Sheet: Feuil1
Table S6. Proteins enriched in WT macrophages compared to mDCIR1-KO macrophages following selective proteomic proximity labeling assay. HRP-conjugated anti-mDCIR1 (TKKT-1) and biotin tyramide reagent was used to biotinylated proteins closed to mDCIR1 at the cell surface of WT and mDCIR1-KO BMDM. After cell lysis, biotinylated proteins were enriched using Streptavidin Dynabeads and analyzed by pro…
Gene name	log2(fold change)	-log10(p-value)
Clec4a	5.21568	1.77327
Diaph3	4.61941	0.405151
Nrp1	4.52482	1.39661
Cd93	4.15056	0.958004
Clec12a	4.12267	1.44601
Ly86	4.04177	1.10936
Tlr2	3.60999	1.44055
Adgre1	3.27202	1.32461
Ighg1	3.12928	0.71465
Itgb5	2.99095	1.88389
Atp2b1	2.88947	0.288028
Cd72	2.80323	1.66686
Fpr1	2.67356	1.63248
Plxnb2	2.51602	1.62628
Fpr2	2.43029	1.88313
Blmh	2.28688	0.0284639
H2-Aa	2.20789	1.56185
Fcgr1	2.18903	1.84594
Trim21	2.16672	0.883103
C5ar1	2.15704	2.45296
Icoslg	2.08066	1.34363
Fcgr3	2.08066	2.15695
Padi4	2.07724	2.48532
Lrp1	2.04963	2.39502
Ptprj	2.03562	1.63517
Ptpro	1.9855	1.89942
Atp1a1	1.96347	1.67724
Slc16a3	1.88753	2.21983
Lilrb3	1.81558	1.43642
H2-K1	1.81147	3.50724
Ptprc	1.774	1.46452
Ahsg	1.74846	1.20295
Itgav	1.70487	1.2715
C3ar1	1.69599	1.36423
Itpr2	1.69153	0.387532
Acp5	1.68706	0.0882705
Siglec1	1.63691	1.55286
Itga4	1.62761	1.1814
Itga5	1.62293	1.39555
Cers2	1.60407	0.482305
Tfrc	1.58496	1.24458
Dera	1.53605	0.0455336
Itgal	1.51096	1.4358
H2-Ab1	1.50589	1.1346
Mrc1	1.45418	1.93697
Hbb-b1	1.43296	0.632817
Stab1	1.41143	1.53442
Ptpn6	1.36737	2.78015
Hba	1.34483	0.557332
Cd36	1.33342	0.807226
Cd274	1.33342	1.98301
Anxa6	1.26903	0.173755
Ms4a6b	1.25701	1.14041
Lilrb4	1.23266	1.39713
Dnaja1	1.20163	0.693521
Lrpap1	1.20163	1.77276
P2rx7	1.20163	3.39686
Mvp	1.18903	1.02022
Oasl1	1.1375	1.8882
Tap1	1.09085	0.993757
Rfc3	1.08406	1.49982
Atp1b3	1.08406	2.61083
Folr2	1.0635	0.628609
B2m	1.0635	1.88817
Tpm2	1.04963	0.0427822
Commd9	1.04963	0.0433111
Cdipt	1.04963	0.840818
Atl3	1.02148	0.000149423
Txndc9	0.978196	0.800165
Pcyt1a	0.956057	0.928715
Lgals9	0.956057	2.38637
Itm2b	0.933573	0.946887
Yipf4	0.933573	1.11648
Cd74	0.925999	0.752717
Itgb1	0.918386	1.02064
Cltc	0.918386	1.2225
Ccr5	0.918386	1.25517
Itga6	0.895303	1.15196
Vdac2	0.887525	1.23552
Itgb6	0.85599	1.13485
Gnb2	0.847997	1.31285
Ilk	0.831877	0.137703
H2-K1	0.831877	1.02417
Tmem206	0.823749	1.39879
Prkra	0.815575	0.122684
Rpl22l1	0.815575	0.18613
Unc93b1	0.815575	0.528208
Snu13	0.815575	0.572676
Fcgr2	0.815575	1.1935
Hnrnpa1	0.807355	0.904628
Map2k1	0.790772	0.245662
FRRS1	0.782409	0.110392
Ifi35	0.773996	0.713815
Tlr13	0.757023	0.20414
Cd14	0.757023	0.541701
Atp12a	0.748461	0.184069
Anxa4	0.748461	0.840773
Gnai2	0.748461	1.16139
Aimp1	0.731183	0.526576
Itgax	0.722466	0.6396
Hsdl1	0.722466	0.80815
Eef1e1	0.722466	0.905655
Btf3l4	0.704872	0.132817
Hist1h2ab	0.704872	0.169765
Fcgr4	0.704872	0.575327
Vdac3	0.695994	0.930169
H2-D1	0.695994	1.93885
Cd300ld3	0.687061	0.168316
Itgam	0.687061	0.851709
Irgm1	0.687061	1.18169
Ctsl	0.678072	0.0585129
Atp6v1b2	0.678072	0.3141
Lyn	0.678072	0.408973
Mgst3	0.678072	0.598613
Ly9	0.669027	1.19866
Chil3	0.659925	0.00682928
Srsf7	0.659925	0.189532
Ap3m1	0.659925	1.05532
Plscr3	0.650765	0.206352
Tspo	0.650765	0.448854
Dock2	0.650765	0.659707
Zbp1	0.650765	0.752665
Cept1	0.650765	0.839168
Fnip2	0.650765	2.67244
Stt3a	0.641546	0.388007
Plbd2	0.641546	0.410866
Tmem33	0.641546	0.570346
Fbxw2	0.641546	1.11635
Plac8	0.632268	0.186809
Tlr9	0.632268	0.301448
Krt71	0.632268	0.505025
Scly	0.62293	0.251995
Trex1	0.62293	0.627808
Srgap1	0.613532	0.300228
Slc4a1	0.613532	0.832184
Slc3a2	0.613532	2.63771
Synj2bp	0.604071	0.379367
Ap2m1	0.594549	0.742475
Lgals8	0.594549	1.11573
Anxa7	0.584963	0.216327
Gsdmdc1	0.584963	0.39718
Ap2s1	0.584963	0.877899
Gna13	0.575312	1.0507
Nhlrc3	0.565597	0.00367487
Glmp	0.565597	0.236786
Por	0.565597	0.34386
Tapbp	0.565597	0.568979
Clec10a	0.565597	0.853236
Aga	0.555816	0.0589554
Krt10	0.555816	0.183517
Derl1	0.555816	0.855849
Itgb2	0.555816	0.936318
Chchd3	0.555816	1.11273
Ddb1	0.545968	0.0391778
Clta	0.545968	0.402576
Basp1	0.545968	0.773485
Isg20	0.545968	1.66869
Lars	0.536053	0.243731
Rars	0.536053	0.313915
Srp9	0.536053	0.503324
Mgst1	0.536053	0.778174
Ppp1cc	0.526069	0.233825
Cox6a1	0.526069	0.341202
Sod2	0.516015	0.0192964
Trim25	0.516015	0.0977849
Bax	0.516015	0.131995
Isg15	0.505891	0.0165803
Anxa3	0.505891	0.157575
Nucb2	0.505891	0.201148
Cmpk2	0.505891	0.398963
Pik3ap1	0.505891	0.767042
Marcks	0.495695	0.216146
Phf11	0.495695	0.226433
Tbc1d8b	0.495695	0.324138
Stat1	0.495695	0.757444
Gnb1	0.495695	1.13577
Myg1	0.485427	0.0288411
Parp9	0.485427	0.116499
Smc1b	0.485427	0.169644
Myl6b	0.485427	0.180922
Sec61a1	0.485427	0.328031
Slc25a3	0.485427	0.67373
Tap2	0.485427	0.777955
Ugt1a7c	0.475085	0.0411204
Rpl35	0.475085	0.0464017
Gm2a	0.475085	0.0553313
Fmnl1	0.475085	0.0925897
Cd48	0.475085	0.183863
Rbm14	0.475085	0.22765
Krt73	0.475085	0.237027
Dars	0.475085	0.342248
Ap3s1	0.475085	0.460368
Ap2b1	0.475085	0.667948
Ostc	0.475085	1.10293
Myl6	0.464668	0.0373972
Gatd1	0.464668	0.163746
Atp2a2	0.464668	0.334086
Ctsc	0.464668	0.459986
Cd84	0.464668	0.506952
Tomm22	0.464668	0.642616
Tlr7	0.464668	0.694148
Lnpep	0.464668	1.01706
Arf1	0.454176	0.155063
Bst2	0.454176	0.199355
Fcer1g	0.454176	0.665631
Hnrnpa2b1	0.454176	1.24906
Npm1	0.443607	0.0655536
Fam129b	0.443607	0.390233
Ap2a2	0.443607	0.599369
Slc25a5	0.443607	0.671959
Rac2	0.443607	1.17225
Psma4	0.432959	0.065338
Pigk	0.432959	0.159136
Cse1l	0.432959	0.244776
Cct3	0.432959	0.284773
Sdf2l1	0.432959	0.316809
Rnf13	0.432959	0.471958
Lrrc25	0.432959	0.657441
Mcl1	0.432959	0.777193
Atp5c1	0.432959	1.39781
C1qb	0.432959	1.56519
Stx12	0.422233	0.0351344
Txn2	0.422233	0.0837472
Aif1	0.422233	0.0903322
Lyz2	0.422233	0.127925
Vti1b	0.422233	0.151427
Anxa11	0.422233	0.180586
Trnt1	0.422233	0.197883
Myh9	0.422233	0.326131
Rheb	0.411426	0.0210466
Arpc5l	0.411426	0.049602
Zc3h6	0.411426	0.108116
Tmod3	0.411426	0.116055
Atp5i	0.411426	0.137511
Dpy30	0.411426	0.139092
P2rx4	0.411426	0.151959
Rab18	0.411426	0.399663
Sphk2	0.411426	0.431748
Atad3	0.411426	0.774357
Myl12b	0.400538	0.00172932
Npc2	0.400538	0.047771
Gns	0.400538	0.083244
Chp1	0.400538	0.118936
Lsm5	0.400538	0.18593
Atp6v1a	0.400538	0.227115
Arl8b	0.400538	0.239906
Fxyd5	0.400538	0.296
Parvb	0.400538	0.359021
Oas1a	0.400538	1.36156
Stom	0.400538	2.03867
Tpm3	0.389567	0.0679851
Tpm4	0.389567	0.151629
Psmg2	0.389567	0.18656
Galc	0.389567	0.416468
Ifit1	0.389567	1.70523
Esd	0.378512	0.000416688
Mycbp	0.378512	0.121242
Fcgrt	0.378512	0.418978
Atp6v1c1	0.378512	0.530443
Bak1	0.378512	0.877483
Vapa	0.378512	1.01365
Myl1	0.367371	0.0218081
Gbp2	0.367371	0.0758836
Sec22b	0.367371	0.160917
Uqcrq	0.367371	0.228632
Sirpa	0.367371	0.392873
Cpt1a	0.367371	0.562739
Stat2	0.367371	0.613656
Slc25a4	0.367371	0.69449
Evl	0.356144	0.0284695
Hgsnat	0.356144	0.0512223
Rps24	0.356144	0.0514262
Cd180	0.356144	0.174739
Ptk2b	0.356144	0.523721
Chmp3	0.356144	0.54976
Trim23	0.356144	0.661356
Slc25a10	0.356144	1.11309
	0.356144	1.59513
Soat1	0.344828	0.1737
Ptrh2	0.344828	0.201657
Ipo7	0.344828	0.218301
Ap1b1	0.344828	0.253734
Ddx58	0.344828	0.292305
Pld4	0.344828	0.425443
Tpm1	0.344828	0.448182
Rpn1	0.344828	0.523494
Samm50	0.344828	0.719579
Anxa2	0.344828	0.726582
Sqor	0.344828	1.39447
Cbln1	0.344828	1.50045
Psmb10	0.333424	0.0269692
Zc3hav1	0.333424	0.0614082
Chmp4b	0.333424	0.141092
Svil	0.333424	0.186336
Rnpep	0.333424	0.19198
Krt79	0.333424	0.233126
Larp1	0.333424	0.354577
Mtch2	0.333424	0.610917
Pgap1	0.333424	1.25846
Pts	0.321928	0.00324104
Katnal2	0.321928	0.00529185
Actc1	0.321928	0.0287808
Rpl10a	0.321928	0.0363982
Fabp5	0.321928	0.0682488
Cct6a	0.321928	0.0945042
Cndp2	0.321928	0.118089
Spi1	0.321928	0.152927
Ndufa8	0.321928	0.237169
Dcps	0.321928	0.266844
Cdv3	0.321928	0.285924
Atp6v1d	0.321928	0.372126
Tbxas1	0.321928	0.719535
Stoml3	0.321928	0.749417
Anxa1	0.321928	0.763246
Rps10	0.31034	0.0147379
Sppl2a	0.31034	0.0860919
Ggh	0.31034	0.0981789
Cand1	0.31034	0.111779
Cep162	0.31034	0.135962
Slc25a24	0.31034	0.206922
Nudt21	0.31034	0.208841
Psmd6	0.31034	0.232252
Eif3m	0.31034	0.239519
Naga	0.31034	0.303506
C1qbp	0.31034	0.785845
Hmox2	0.31034	0.974866
Ckap4	0.298658	0.00787657
Vps35	0.298658	0.0210712
Srprb	0.298658	0.0578565
Rpl31	0.298658	0.0755517
Fth1	0.298658	0.0891681
Il1rn	0.298658	0.151768
Fxr1	0.298658	0.169617
Sri	0.298658	0.183362
Oas3	0.298658	0.184717
Erbin	0.298658	0.190001
Krt2	0.298658	0.228635
Hnrnpc	0.298658	0.478944
Lgals3bp	0.298658	0.486185
Adap2	0.298658	0.553303
Lpcat2	0.298658	0.567573
Ap2a1	0.298658	0.623376
Ndufs3	0.298658	0.689362
Atp6v0d1	0.298658	0.977988
RTRAF	0.286881	0.0170462
Eif2s1	0.286881	0.0184387
Myh11	0.286881	0.0207308
Idh2	0.286881	0.0351513
Arsb	0.286881	0.0627369
Arl8a	0.286881	0.104642
Stoml2	0.286881	0.110317
Sts	0.286881	0.293385
Phb2	0.286881	0.354591
Rab33b	0.286881	0.439166
Erlin1	0.286881	0.490385
Fam76b	0.286881	0.619908
Grb2	0.286881	0.641177
Evi2b	0.286881	0.822152
Immt	0.286881	0.965263
Vps37c	0.275007	0.0246656
Sod1	0.275007	0.0714741
Rps19	0.275007	0.0738953
Idh1	0.275007	0.0934904
Tor1aip1	0.275007	0.11743
Cox5b	0.275007	0.169739
Rpn2	0.275007	0.217573
Eprs	0.275007	0.268006
Acyp1	0.275007	0.499816
Rap1a	0.275007	0.646511
Arhgef2	0.275007	0.820038
Tmed10	0.275007	1.07857
Stx4	0.275007	1.08303
Cfl1	0.263034	0.010013
Gpsm3	0.263034	0.03839
Tubb2a	0.263034	0.0733906
Itch	0.263034	0.115886
Psmd11	0.263034	0.120019
Cct4	0.263034	0.139487
Rab11b	0.263034	0.141566
Abracl	0.263034	0.161723
Apoe	0.263034	0.263881
Actg1	0.263034	0.291487
Chmp2a	0.263034	0.338646
Atp6v1h	0.263034	0.42591
Ddost	0.263034	0.449468
Adar	0.263034	0.502105
Tgtp1	0.263034	0.645095
Pi4k2a	0.263034	0.656034
Gas7	0.263034	0.914449
Mns1	0.250962	0.0444729
Sec61b	0.250962	0.0478597
Rpl9	0.250962	0.0498397
Hsd17b11	0.250962	0.0504919
Glg1	0.250962	0.0547393
Rps13	0.250962	0.0554428
Nap1l1	0.250962	0.115581
Lamp2	0.250962	0.167704
Timm8b	0.250962	0.203819
Grn	0.250962	0.229121
Anxa5	0.250962	0.452771
Kcnab2	0.250962	0.463908
Slc25a12	0.250962	0.493892
Uqcrfs1	0.250962	0.681125
Anpep	0.250962	0.859835
Uqcrc2	0.250962	0.900893
Prkar1a	0.238787	0.0132981
Efhd2	0.238787	0.0181366
Ahcy	0.238787	0.0443767
Dhx58	0.238787	0.0809889
Cct7	0.238787	0.159703
Rhog	0.238787	0.265868
Rragc	0.238787	0.277754
Marc2	0.238787	0.329972
Ssbp1	0.238787	0.343072
Dnajb11	0.238787	0.394091
C1qa	0.238787	0.789312
Tmco1	0.238787	1.30604
Slc25a11	0.238787	1.98995
Dlgap4	0.226509	0.015641
Scpep1	0.226509	0.0350944
Sec31b	0.226509	0.0457585
Ube2d2b	0.226509	0.0676262
Pebp1	0.226509	0.102183
Itih3	0.226509	0.145046
Tor4a	0.226509	0.146492
Myo1g	0.226509	0.165895
Nme1	0.226509	0.211056
Apobec1	0.226509	0.23791
Ctsh	0.226509	0.31895
Igbp1	0.226509	0.396343
Ctsz	0.226509	0.501729
Dpm1	0.226509	0.604431
Hadhb	0.226509	0.608622
Emc3	0.226509	0.65001
Yipf5	0.226509	0.76269
Vps4b	0.214125	0.0360635
Dnm2	0.214125	0.0570935
Lamtor4	0.214125	0.0665871
Chchd2	0.214125	0.0898245
Iqgap1	0.214125	0.0954484
Celsr3	0.214125	0.101044
Acp2	0.214125	0.105872
Hdhd2	0.214125	0.164492
Fam129a	0.214125	0.222158
Psmd12	0.214125	0.254075
Ndufb3	0.214125	0.278862
Enpp1	0.214125	0.314135
Atp6v1e1	0.214125	0.380789
Lmnb1	0.214125	0.541294
Rab39a	0.214125	0.586512
Slc25a1	0.214125	0.592268
Mlec	0.214125	0.671906
Dbnl	0.201634	0.000923423
Ergic1	0.201634	0.0156401
Cpne3	0.201634	0.0203228
Nudc	0.201634	0.0266163
Mesd	0.201634	0.0586536
Oasl2	0.201634	0.0647034
Spcs2	0.201634	0.158507
Actr2	0.201634	0.161556
Apobec3	0.201634	0.166314
Hk1	0.201634	0.184923
Raly	0.201634	0.191163
Ssr3	0.201634	0.237062
Lgals3	0.201634	0.243122
Samhd1	0.201634	0.250639
Abhd12	0.201634	0.839787
Paics	0.189034	0.0101979
Cyb5b	0.189034	0.0404468
Ehd4	0.189034	0.0412016
Fbll1	0.189034	0.0456185
Psme1	0.189034	0.047225
Cct2	0.189034	0.0554443
Hnrnpa0	0.189034	0.073187
Lactb	0.189034	0.091825
Serbp1	0.189034	0.134297
Creg1	0.189034	0.246868
Pyhin1	0.189034	0.365891
Rab5b	0.189034	0.400827
Psme2	0.189034	0.470833
Vps26a	0.189034	0.508791
Capn2	0.189034	0.512556
Ifit3	0.189034	0.56357
Frg1	0.176323	0.00430296
Srsf3	0.176323	0.00501761
Rtn3	0.176323	0.0117814
Uqcrb	0.176323	0.0136457
Nap1l4	0.176323	0.0148089
Plekho2	0.176323	0.0279991
Rpl26	0.176323	0.0454333
Cox6c	0.176323	0.0529341
Rpl24	0.176323	0.121786
Rps7	0.176323	0.182246
Pnp	0.176323	0.201958
Sh3glb1	0.176323	0.301815
Krt42	0.176323	0.325614
Arpc1b	0.176323	0.330561
Pafah1b2	0.176323	0.539637
Hadha	0.176323	0.743535
Vdac1	0.176323	1.08916
Myh10	0.163499	0.00740451
Sfxn3	0.163499	0.021421
Arpc4	0.163499	0.130998
Tmem65	0.163499	0.214563
S100a4	0.163499	0.221399
Fabp3	0.163499	0.242187
Tagln3	0.163499	0.273252
Rab21	0.163499	0.297596
Cyba	0.163499	0.315189
Htra2	0.163499	0.328266
Tsg101	0.163499	0.489056
Gclm	0.163499	0.491756
Sec11a	0.163499	0.795663
Ahsa1	0.163499	1.01565
Pcmt1	0.15056	0.00174197
Tnfaip8l2	0.15056	0.0230103
Rplp0	0.15056	0.0279324
Hnrnpm	0.15056	0.0452612
Rpl5	0.15056	0.0511725
Copb2	0.15056	0.0570395
Tmem50b	0.15056	0.0709082
Entpd1	0.15056	0.080812
Camk2d	0.15056	0.10973
Dnpep	0.15056	0.13997
Rtn4	0.15056	0.142698
Arpc2	0.15056	0.147631
Atp5b	0.15056	0.169479
Gapdh	0.15056	0.228257
Picalm	0.15056	0.65341
Hsd17b12	0.15056	0.869422
Atp6v1f	0.137504	0.00678913
Pafah1b1	0.137504	0.0282034
Ndufa13	0.137504	0.0294658
Mrps17	0.137504	0.0561282
Slc9a3r1	0.137504	0.121598
Cstb	0.137504	0.127686
Zpr1	0.137504	0.137975
Bcl2l1	0.137504	0.155661
Rps15	0.137504	0.171515
P4hb	0.137504	0.237212
Rps29	0.137504	0.240845
Commd2	0.137504	0.242968
Jup	0.137504	0.340455
Lsm3	0.124328	0.00813315
Aifm1	0.124328	0.00942319
Mif	0.124328	0.016708
Alb	0.124328	0.0288912
Eif3j1	0.124328	0.0391816
Dok1	0.124328	0.0521895
Rps18	0.124328	0.0524687
Eef1d	0.124328	0.0647266
Dnajc5	0.124328	0.0949395
Npc1	0.124328	0.132035
Nampt	0.124328	0.183452
Ppib	0.124328	0.186962
Qars	0.124328	0.220608
Washc3	0.124328	0.228036
Rpl6	0.124328	0.23224
Tpp1	0.124328	0.334831
Rraga	0.124328	0.355335
Tnfaip8	0.124328	0.558242
Tecr	0.124328	0.662862
Fuom	0.111031	0.00933177
Lap3	0.111031	0.0286332
G6pdx	0.111031	0.0421208
Cycs	0.111031	0.0451697
Atp5l	0.111031	0.0751105
Hsp90ab1	0.111031	0.0853301
Glo1	0.111031	0.0868715
Sars	0.111031	0.0999247
Amdhd2	0.111031	0.103396
Txndc12	0.111031	0.11975
Prdx1	0.111031	0.1541
Pdlim5	0.111031	0.170465
Fam49b	0.111031	0.180524
Arpc1a	0.111031	0.192352
Atp5h	0.111031	0.198299
Snrpb2	0.111031	0.201924
Rpl36	0.111031	0.205381
Hnrnpa3	0.111031	0.236782
Mybbp1a	0.111031	0.262573
Ehd1	0.111031	0.277719
Rpl29	0.111031	0.300664
Tmem109	0.111031	0.364444
Tmem43	0.111031	0.394742
Nexn	0.111031	0.395571
Cybb	0.111031	0.399137
Man2b2	0.111031	0.400005
Nadk	0.111031	0.407081
Vsir	0.111031	0.423292
Isoc1	0.111031	0.620236
Mpp1	0.0976108	0.00645356
Acaa2	0.0976108	0.0142871
Ptbp1	0.0976108	0.0200125
Xdh	0.0976108	0.0244533
Rack1	0.0976108	0.0246482
Ndufa9	0.0976108	0.041785
Dynll2	0.0976108	0.052991
S100a11	0.0976108	0.0554413
Capn1	0.0976108	0.108873
Tm9sf3	0.0976108	0.124852
Agfg1	0.0976108	0.171744
Twf1	0.0976108	0.200789
Bcap31	0.0976108	0.221408
Arhgap25	0.0976108	0.237692
Alcam	0.0976108	0.259438
Vamp8	0.0976108	0.265896
Hist1h4a	0.0976108	0.274162
Rgs10	0.0976108	0.283464
Gabarap	0.0976108	0.289794
Krt5	0.0976108	0.291917
Rpl18	0.0976108	0.315526
Abi1	0.0976108	0.363054
Esyt1	0.0976108	0.36418
Surf4	0.0976108	0.365727
Phpt1	0.0976108	0.448354
Rab2a	0.0976108	0.553017
Rab14	0.0976108	0.568418
Bin2	0.0976108	0.579998
Rmdn3	0.0976108	0.765169
Rab10	0.0976108	1.06799
Cct8	0.0840643	0.00663608
Arrb1	0.0840643	0.00994322
Ralb	0.0840643	0.0134379
Rab6a	0.0840643	0.0143674
Dpysl2	0.0840643	0.030544
Eef1g	0.0840643	0.0464051
Cmpk1	0.0840643	0.0754685
Anp32a	0.0840643	0.0777111
Lbr	0.0840643	0.0834182
Skap2	0.0840643	0.0959415
Rpl13	0.0840643	0.171257
Ccdc124	0.0840643	0.172307
Mapk1	0.0840643	0.189303
Wipf1	0.0840643	0.235404
Srp14	0.0840643	0.242032
Zyx	0.0840643	0.249549
Spag9	0.0840643	0.250678
Capns1	0.0840643	0.267123
Serpinb6	0.0840643	0.362003
Cyc1	0.0840643	0.510219
Mnda	0.0840643	0.640724
Rps20	0.0703893	0.0020028
Hras	0.0703893	0.00339465
Ube2l3	0.0703893	0.015259
Nqo2	0.0703893	0.0185855
Mapk14	0.0703893	0.0436433
Eps15l1	0.0703893	0.056237
Ufm1	0.0703893	0.0623267
Rps25	0.0703893	0.0754628
Lcp1	0.0703893	0.0761356
Lman2	0.0703893	0.0877142
Snrpd3	0.0703893	0.10921
Psme3	0.0703893	0.111057
Tcp1	0.0703893	0.118377
Myo9b	0.0703893	0.13199
Pik3r1	0.0703893	0.132223
Rab43	0.0703893	0.138063
Eif2ak2	0.0703893	0.182847
Atp5a1	0.0703893	0.206858
Dido1	0.0703893	0.216838
Lasp1	0.0703893	0.217376
Cpne1	0.0703893	0.225802
Rps12	0.0703893	0.227112
Tpd52l2	0.0703893	0.24471
Sgpl1	0.0703893	0.28772
Scamp2	0.0703893	0.289821
Pgm5	0.0703893	0.29419
Apool	0.0703893	0.495962
Commd10	0.0703893	0.518148
Necap2	0.0565835	0.00762678
Gmfb	0.0565835	0.00931891
Cd44	0.0565835	0.0110756
Ndufa2	0.0565835	0.0165248
Ndufa4	0.0565835	0.0170448
Tmem14c	0.0565835	0.0187478
Eef1b	0.0565835	0.0307481
Eno3	0.0565835	0.0433879
Dnm3	0.0565835	0.043797
Mrps23	0.0565835	0.0487956
Arcn1	0.0565835	0.0488875
Ywhaq	0.0565835	0.0544423
Fermt3	0.0565835	0.0789615
Arhgdib	0.0565835	0.0842642
Dynlt1	0.0565835	0.100292
Rab32	0.0565835	0.108866
Commd3	0.0565835	0.110573
Dgkz	0.0565835	0.111564
Ssr1	0.0565835	0.122564
Psmc4	0.0565835	0.13511
Trap1	0.0565835	0.157235
Stx7	0.0565835	0.160326
Sh3bgrl2	0.0565835	0.172254
Fam162a	0.0565835	0.177615
Syk	0.0565835	0.187757
Sh3gl1	0.0565835	0.192279
Dhrs7b	0.0565835	0.193727
Eif1ax	0.0565835	0.213182
H2afy	0.0565835	0.258983
Myo1c	0.0565835	0.26724
Rtcb	0.0565835	0.269835
Ndufb10	0.0565835	0.287969
Prkcsh	0.0565835	0.305162
Snx4	0.0565835	0.324277
Trappc3	0.0565835	0.329378
Eif3h	0.0565835	0.35439
Prkcb	0.0565835	0.361607
Actb	0.0565835	0.454997
Rpl12	0.0426443	0.0184305
Rps27a	0.0426443	0.023501
Spcs3	0.0426443	0.0277421
Actr1a	0.0426443	0.03019
Rab1A	0.0426443	0.0323355
Kpna3	0.0426443	0.0349748
Erp44	0.0426443	0.0503324
Arpc3	0.0426443	0.089398
Hdgf	0.0426443	0.116888
Rps17	0.0426443	0.144303
Ykt6	0.0426443	0.161084
Scp2	0.0426443	0.185542
Nptn	0.0426443	0.204117
Cotl1	0.0426443	0.224903
Lmna	0.0426443	0.225152
Mpc2	0.0426443	0.233123
Rpl39	0.0426443	0.251161
Ccdc22	0.0426443	0.274892
Csnk2a1	0.0426443	0.376274
Pqlc3	0.0426443	0.385152
Hspa8	0.0426443	0.412305
Capza2	0.0426443	0.512026
C1qc	0.0426443	0.542924
Pip4k2a	0.0426443	0.727462
Ldha	0.0285692	0.00811501
Rpl23a	0.0285692	0.0178641
Lamtor1	0.0285692	0.0208278
Actr3	0.0285692	0.0254528
Eif5	0.0285692	0.0442156
Fbl	0.0285692	0.0477875
Psmd8	0.0285692	0.0659532
Mylk	0.0285692	0.0757429
Mylk2	0.0285692	0.0757429
Elob	0.0285692	0.0760331
Arhgdia	0.0285692	0.0788975
Acad10	0.0285692	0.0816844
Pitpnb	0.0285692	0.0952644
Rps26	0.0285692	0.131173
Ubqln2	0.0285692	0.150127
Arl6ip5	0.0285692	0.151417
Vasp	0.0285692	0.172376
Nars	0.0285692	0.174139
Hist2h2aa1	0.0285692	0.177107
Ostf1	0.0285692	0.179259
Znf706	0.0285692	0.230013
Ak3	0.0285692	0.25337
Aimp2	0.0285692	0.261109
Sumo2	0.0285692	0.306021
Ptgr1	0.0285692	0.348746
Krt1	0.0285692	0.359185
Ap1m1	0.0285692	0.469652
Nagpa	0.0285692	0.480081
Chmp5	0.0143553	0.00825043
Ncf1	0.0143553	0.015232
Sec23b	0.0143553	0.0167568
Slc43a2	0.0143553	0.0198325
Rps11	0.0143553	0.0291573
Msr1	0.0143553	0.0357979
Ppid	0.0143553	0.0368769
Cab39	0.0143553	0.0407887
Phb	0.0143553	0.0516081
Cyb5a	0.0143553	0.0572342
Ndufb11	0.0143553	0.0677434
Man2b1	0.0143553	0.0709138
Myof	0.0143553	0.0751457
Rab15	0.0143553	0.0782496
Mpeg1	0.0143553	0.0807388
Snrpd2	0.0143553	0.0912309
Usp5	0.0143553	0.0938094
Mfap1a	0.0143553	0.0967369
Ywhag	0.0143553	0.107379
Man2a1	0.0143553	0.110487
Rpl22	0.0143553	0.11545
Rps21	0.0143553	0.121594
Rab8a	0.0143553	0.129939
Cox4i1	0.0143553	0.139129
Rab5c	0.0143553	0.209476
Rufy3	0.0143553	0.268992
Cmtm7	0.0143553	0.271593
Pgrmc1	0.0143553	0.290439
Prkacb	0.0143553	0.446485
Chmp1a	0	0.0112079
Erp29	0	0.018873
Psmc3	0	0.0266698
Hk3	0	0.0294119
Atp5o	0	0.0309514
Cnpy3	0	0.0378329
Bzw1	0	0.0429782
Ifi204	0	0.053562
Alox5ap	0	0.0567068
Cacybp	0	0.0648819
Scin	0	0.0754494
Hpcal1	0	0.0961474
Ndufa11	0	0.109961
Hnrnpab	0	0.113008
Tpi1	0	0.114426
Canx	0	0.128045
Rpl28	0	0.128532
Myh14	0	0.13179
Pdia6	0	0.14492
Snrpd1	0	0.165504
Tmed5	0	0.16674
Psmd4	0	0.16998
Pycard	0	0.180933
Stip1	0	0.197009
Clic4	0	0.209019
Twf2	0	0.269612
Cln5	0	0.274148
Coa3	0	0.278092
Cfl2	0	0.320374
Rab7a	-0.0144996	0.0144586
Idh3a	-0.0144996	0.0375705
Hspe1	-0.0144996	0.0669305
Pgm1	-0.0144996	0.0714275
Nagk	-0.0144996	0.0979917
Rps15a	-0.0144996	0.0991764
Cct5	-0.0144996	0.104522
Smap1	-0.0144996	0.114012
Pitpna	-0.0144996	0.136766
Sept2	-0.0144996	0.141174
Vps13b	-0.0144996	0.145777
Ndufb4	-0.0144996	0.150156
Impa1	-0.0144996	0.152359
Mogs	-0.0144996	0.15869
Ndufv2	-0.0144996	0.164566
Cab39l	-0.0144996	0.168919
Mrpl49	-0.0144996	0.171579
Arrb2	-0.0144996	0.180692
Rpl37a	-0.0144996	0.189912
Lypla1	-0.0144996	0.194105
Khdrbs1	-0.0144996	0.200159
Pgrmc2	-0.0144996	0.20514
Abhd14b	-0.0144996	0.226558
Map3k3	-0.0144996	0.294442
Adprh	-0.0144996	0.296327
Commd8	-0.0144996	0.310963
Atpif1	-0.0144996	0.367577
Lmbrd1	-0.0144996	0.462418
Mpo	-0.0144996	0.524683
Dstn	-0.0291463	0.00286754
Kctd12	-0.0291463	0.00705963
Fis1	-0.0291463	0.0106828
Pgls	-0.0291463	0.0361433
Rps16	-0.0291463	0.0422017
Cisd2	-0.0291463	0.0555218
Rnh1	-0.0291463	0.0598348
Rpl11	-0.0291463	0.0685081
Spcs1	-0.0291463	0.0689817
Rps4x	-0.0291463	0.0694116
Etfa	-0.0291463	0.0777163
Rap2b	-0.0291463	0.101623
Marcksl1	-0.0291463	0.102009
Rac1	-0.0291463	0.10287
Eif3a	-0.0291463	0.125308
Fnbp1	-0.0291463	0.129195
Smap	-0.0291463	0.158065
Pclo	-0.0291463	0.183125
Ywhaz	-0.0291463	0.205239
Atp6v1g1	-0.0291463	0.224777
Park7	-0.0291463	0.285881
Rcn2	-0.0291463	0.285958
Rpl21	-0.0291463	0.290061
Gstp1	-0.0291463	0.302997
Plp2	-0.0291463	0.353375
Anp32e	-0.0291463	0.407323
Grpel1	-0.0291463	0.536712
Hars	-0.0439433	0.00648001
Ddx5	-0.0439433	0.00933133
Strap	-0.0439433	0.00963939
Ist1	-0.0439433	0.00966781
Dnajc8	-0.0439433	0.0101984
Pitrm1	-0.0439433	0.022597
Gsto1	-0.0439433	0.0282762
Lxn	-0.0439433	0.0287358
Set	-0.0439433	0.0343638
Pgm2	-0.0439433	0.0360262
Pcyox1	-0.0439433	0.0421491
Ap1g1	-0.0439433	0.0453567
Rps3a	-0.0439433	0.0460148
Tardbp	-0.0439433	0.0469259
Rhoa	-0.0439433	0.0555543
Cpne2	-0.0439433	0.0606175
Lta4h	-0.0439433	0.0907639
Rpl35a	-0.0439433	0.0943266
Coro7	-0.0439433	0.124456
Prdx6	-0.0439433	0.138749
Rbmx	-0.0439433	0.149962
Rpl27	-0.0439433	0.160535
Dctn2	-0.0439433	0.176954
Ran	-0.0439433	0.197233
Cbr1	-0.0439433	0.208781
Tktl1	-0.0439433	0.231681
Ephx1	-0.0439433	0.239149
Cd2ap	-0.0439433	0.254054
Plec	-0.0439433	0.269548
Trappc5	-0.0439433	0.280998
Cat	-0.0439433	0.28565
Dhx30	-0.0439433	0.295179
Ca2	-0.0439433	0.296071
Reep5	-0.0439433	0.303778
Mydgf	-0.0439433	0.304013
Napa	-0.0439433	0.30781
Sept6	-0.0439433	0.316234
Gng5	-0.0439433	0.319034
Sash3	-0.0439433	0.327762
Myo18a	-0.0439433	0.366528
Apip	-0.0439433	0.494466
Rbm39	-0.0439433	0.49622
Eif2s2	-0.0439433	0.529387
Vwa5a	-0.0588937	0.00408458
Coro1a	-0.0588937	0.016555
Prdx2	-0.0588937	0.0328701
Clic1	-0.0588937	0.0626246
Tram1	-0.0588937	0.0709062
Mdh1	-0.0588937	0.0709568
Cope	-0.0588937	0.0792732
Apbb1ip	-0.0588937	0.0885233
Ncstn	-0.0588937	0.0931162
Tmed9	-0.0588937	0.100576
Hsp90aa1	-0.0588937	0.102509
Ube2i	-0.0588937	0.122279
Otub1	-0.0588937	0.124252
Cnpy2	-0.0588937	0.127194
Rpl7a	-0.0588937	0.12986
Arpc5	-0.0588937	0.133024
Gpnmb	-0.0588937	0.146321
Ppia	-0.0588937	0.146364
Ywhah	-0.0588937	0.165567
Wasf2	-0.0588937	0.193374
Arr3	-0.0588937	0.195706
Hnrnpk	-0.0588937	0.203878
Tuba1a	-0.0588937	0.253535
Uqcrh	-0.0588937	0.255443
Siae	-0.0588937	0.274268
Tsn	-0.0588937	0.304122
Hmox1	-0.0588937	0.347635
Snx3	-0.0588937	0.417327
Ppt1	-0.0588937	0.455219
Hmgb1	-0.0588937	0.489598
Psma6	-0.0740006	0.00501454
Stx8	-0.0740006	0.00582191
Calr	-0.0740006	0.0145924
Gng2	-0.0740006	0.0267502
Acot13	-0.0740006	0.0268329
Rpl38	-0.0740006	0.0447501
Capza1	-0.0740006	0.0461896
Manf	-0.0740006	0.0627229
Hsd17b4	-0.0740006	0.0654763
Rdx	-0.0740006	0.068103
Zc3h15	-0.0740006	0.0713164
Mpdu1	-0.0740006	0.0751255
Hint2	-0.0740006	0.0830341
Tifa	-0.0740006	0.0941831
Capzb	-0.0740006	0.108562
Pdia3	-0.0740006	0.139721
Aldh2	-0.0740006	0.165488
Slc37a2	-0.0740006	0.16552
Thumpd1	-0.0740006	0.17152
FAM120A	-0.0740006	0.17213
Hnrnph1	-0.0740006	0.176339
Cmas	-0.0740006	0.206092
Msn	-0.0740006	0.211328
Tmpo	-0.0740006	0.231136
Pura	-0.0740006	0.231446
Edf1	-0.0740006	0.236104
Magohb	-0.0740006	0.240109
Brix1	-0.0740006	0.248956
Iscu	-0.0740006	0.249841
Mdp1	-0.0740006	0.276489
Eif4h	-0.0740006	0.299803
Fau	-0.0740006	0.314988
Degs1	-0.0740006	0.402646
Chmp1b1	-0.0740006	0.454907
Ybx1	-0.0740006	0.460806
Pkm	-0.0892673	0.0065285
Ddx1	-0.0892673	0.0204334
Rps14	-0.0892673	0.0400966
Sh3bp1	-0.0892673	0.0458555
Mob1a	-0.0892673	0.0594392
Atp5e	-0.0892673	0.0625052
Ywhab	-0.0892673	0.0644701
Kpnb1	-0.0892673	0.0659249
Lamtor3	-0.0892673	0.070622
Mtdh	-0.0892673	0.0743378
Rps23	-0.0892673	0.0746864
Ide	-0.0892673	0.0769229
Gnpda1	-0.0892673	0.0896291
Erap1	-0.0892673	0.110921
Blvra	-0.0892673	0.124911
Hm13	-0.0892673	0.12937
Map7d1	-0.0892673	0.132008
Sfn	-0.0892673	0.132264
Psmd2	-0.0892673	0.132864
Lrrc59	-0.0892673	0.150762
Rpl23	-0.0892673	0.156565
Ltbr	-0.0892673	0.156592
Fabp4	-0.0892673	0.164786
Rps6	-0.0892673	0.169737
Scamp1	-0.0892673	0.202388
Oxsr1	-0.0892673	0.202592
Sptan1	-0.0892673	0.206107
Iqgap2	-0.0892673	0.209072
Dnaja2	-0.0892673	0.212969
Eif3l	-0.0892673	0.214919
Rpl27a	-0.0892673	0.247448
Napg	-0.0892673	0.268772
Pea15	-0.0892673	0.30414
Vps25	-0.0892673	0.32863
Vbp1	-0.0892673	0.358689
St13	-0.0892673	0.380306
G3bp2	-0.0892673	0.382282
Rpl36a	-0.0892673	0.388893
Coro1b	-0.0892673	0.393295
Denr	-0.0892673	0.401301
Hsd17b10	-0.0892673	0.449169
Trim14	-0.0892673	0.456486
Mrpl14	-0.0892673	0.46091
Usmg5	-0.0892673	0.466795
Uchl3	-0.0892673	0.74663
Myo5a	-0.104697	2.43212e-05
Pak2	-0.104697	0.0060372
Fus	-0.104697	0.0116168
Vcp	-0.104697	0.0144258
Rab8b	-0.104697	0.0203843
Eif4g1	-0.104697	0.0248813
Rps3	-0.104697	0.027284
Eef1a1	-0.104697	0.0305799
Gda	-0.104697	0.0330679
Comt	-0.104697	0.0342885
Rab35	-0.104697	0.0352997
Ak2	-0.104697	0.0508228
Hpse	-0.104697	0.0654657
Ddrgk1	-0.104697	0.0764125
Snrpb	-0.104697	0.0872929
Ogdh	-0.104697	0.0968166
Ftl1	-0.104697	0.117786
Pdxk	-0.104697	0.153508
Rpl14	-0.104697	0.15412
Tufm	-0.104697	0.181001
Pacsin2	-0.104697	0.224238
Tmsb4x	-0.104697	0.230124
Pdcd6	-0.104697	0.249313
Ssrp1	-0.104697	0.253308
Txn	-0.104697	0.299606
Irak1	-0.104697	0.306244
Rplp2	-0.104697	0.314291
Krtcap2	-0.104697	0.31792
Gsn	-0.104697	0.349687
Slc25a20	-0.104697	0.417455
Ppm1g	-0.104697	0.496209
Atg3	-0.104697	0.611965
Rps6ka1	-0.104697	0.728326
Washc1	-0.104697	0.837244
Eif3g	-0.120294	0.00188458
	-0.120294	0.00772535
	-0.120294	0.0132659
Cdc42	-0.120294	0.0561999
Acadl	-0.120294	0.0609158
Ube2m	-0.120294	0.0730492
Rpl18a	-0.120294	0.149606
Btf3	-0.120294	0.181351
Flii	-0.120294	0.211688
Srsf1	-0.120294	0.214053
Pfn1	-0.120294	0.229796
Psmd14	-0.120294	0.252383
Rps9	-0.120294	0.252933
Arf6	-0.120294	0.255805
Etf1	-0.120294	0.256696
Ywhae	-0.120294	0.262876
Vma21	-0.120294	0.288797
Arhgap30	-0.120294	0.290584
	-0.120294	0.302375
Sipa1	-0.120294	0.416818
Hmga1	-0.120294	0.476942
Eif4a1	-0.120294	0.889528
Psmb9	-0.136062	0.00278448
Wdr1	-0.136062	0.00818448
Eif2s3x	-0.136062	0.0116734
Tor1aip2	-0.136062	0.0155343
Pgd	-0.136062	0.0327086
Cs	-0.136062	0.0539601
Akr1b1	-0.136062	0.0614898
Eif3e	-0.136062	0.0620646
Lyz1	-0.136062	0.0758376
Tcea1	-0.136062	0.0845363
Sdha	-0.136062	0.100436
Ifitm3	-0.136062	0.113197
Ddx39a	-0.136062	0.138868
Tm9sf2	-0.136062	0.139147
Arhgap1	-0.136062	0.144215
Ppp2ca	-0.136062	0.162196
Csrp1	-0.136062	0.174707
Calm1	-0.136062	0.227055
Cox6b1	-0.136062	0.249537
Lrrfip2	-0.136062	0.257146
Aldh9a1	-0.136062	0.265428
Nucb1	-0.136062	0.280917
Eif1	-0.136062	0.29437
Pfdn5	-0.136062	0.31254
Krt72	-0.136062	0.313347
Ganab	-0.136062	0.315618
Psmd1	-0.136062	0.330051
Ethe1	-0.136062	0.330569
Rpl19	-0.136062	0.366019
Pls3	-0.136062	0.426341
Slc44a1	-0.136062	0.430908
Sh3kbp1	-0.136062	0.470293
Hadh	-0.152003	0.0482202
Cops3	-0.152003	0.059146
Pepd	-0.152003	0.0600537
Actn1	-0.152003	0.0639625
Golga2	-0.152003	0.0716733
Tm9sf4	-0.152003	0.0766161
Ythdc2	-0.152003	0.103417
Snx5	-0.152003	0.113271
Stim1	-0.152003	0.124329
Ctsb	-0.152003	0.179899
Txndc5	-0.152003	0.187603
Gpd2	-0.152003	0.190476
Prdx5	-0.152003	0.204603
Rpl8	-0.152003	0.20726
Snx2	-0.152003	0.253634
Cast	-0.152003	0.312492
Fkbp1a	-0.152003	0.320897
Hspa5	-0.152003	0.329298
Tmod1	-0.152003	0.329494
Dusp3	-0.152003	0.388102
Farsa	-0.152003	0.460983
Cox5a	-0.152003	0.564444
Pcbp2	-0.152003	0.584371
Icam1	-0.168123	0.0200721
Ppp2r1a	-0.168123	0.039165
Ube2n	-0.168123	0.0536008
Hexa	-0.168123	0.0845332
Nsfl1c	-0.168123	0.0980635
Pcnp	-0.168123	0.125161
Hist1h2bb	-0.168123	0.140276
Rpl17	-0.168123	0.165857
Asl	-0.168123	0.166379
Psmc1	-0.168123	0.194013
Rab31	-0.168123	0.196226
Pgam1	-0.168123	0.229409
Taldo1	-0.168123	0.252629
Serpinc1	-0.168123	0.271948
Vrk3	-0.168123	0.298239
Lamp1	-0.168123	0.323156
Dad1	-0.168123	0.382349
Rttn	-0.168123	0.425085
Mical1	-0.168123	0.43017
Ubap2l	-0.168123	0.43726
Pym1	-0.168123	0.449302
Tf	-0.168123	0.455607
Flna	-0.168123	0.707378
Cdc37	-0.168123	0.746214
Pkn1	-0.168123	0.798401
Slc25a13	-0.184425	0.000360614
Psmb8	-0.184425	0.010616
Hspd1	-0.184425	0.0130461
Cmc1	-0.184425	0.0409109
Psmc5	-0.184425	0.0531141
Eefsec	-0.184425	0.0558012
Nme2	-0.184425	0.0717655
Plgrkt	-0.184425	0.0843628
Txndc17	-0.184425	0.0944772
Tubb4b	-0.184425	0.103764
Aoah	-0.184425	0.122617
Rpe	-0.184425	0.137859
Tra2b	-0.184425	0.141598
Ckb	-0.184425	0.178842
Rps8	-0.184425	0.190908
Lsp1	-0.184425	0.273213
Dbi	-0.184425	0.325784
Lsm8	-0.184425	0.390161
Acadvl	-0.184425	0.53912
Sec61g	-0.184425	0.703868
Rab11fip5	-0.184425	0.705596
Snap29	-0.200913	0.0209426
Eef2	-0.200913	0.025475
Fam49a	-0.200913	0.0320268
H2afv	-0.200913	0.0351057
Rps5	-0.200913	0.0356414
Tuba4a	-0.200913	0.0388562
Hist1h1c	-0.200913	0.0517196
Acot9	-0.200913	0.0699281
Cul1	-0.200913	0.119548
Hp1bp3	-0.200913	0.163834
Ppp5c	-0.200913	0.166198
Fh	-0.200913	0.211571
Ddx3y	-0.200913	0.237807
Cd47	-0.200913	0.238213
Pfdn2	-0.200913	0.254748
Ewsr1	-0.200913	0.326774
Stk24	-0.200913	0.336847
Top1	-0.200913	0.352708
Map3k19	-0.200913	0.35325
Myo1f	-0.200913	0.430763
Dhx9	-0.200913	0.448218
Mapre1	-0.200913	0.453631
Stmn1	-0.200913	0.540696
Snx1	-0.200913	0.752076
Mbnl1	-0.200913	0.924599
Naxd	-0.217591	0.000425817
Tpd52	-0.217591	0.00415604
Sephs1	-0.217591	0.0176039
Rpsa	-0.217591	0.0699357
Atad1	-0.217591	0.0967846
Psma7	-0.217591	0.129798
Psmb2	-0.217591	0.151924
Lgals1	-0.217591	0.19851
Bin1	-0.217591	0.201175
Khsrp	-0.217591	0.223886
Vps29	-0.217591	0.226883
Ap3b1	-0.217591	0.2284
M6pr	-0.217591	0.22911
Vapb	-0.217591	0.256551
Apobr	-0.217591	0.272378
Anp32b	-0.217591	0.289843
Hspa9	-0.217591	0.338563
Mapk3	-0.217591	0.381216
Rad23b	-0.217591	0.387552
Hnrnpd	-0.217591	0.486096
Nmt1	-0.217591	0.499411
Prkaca	-0.217591	0.721187
Fam213a	-0.217591	0.833431
Lsm2	-0.217591	1.28611
Fkbp2	-0.234465	0.00229653
Ndufa5	-0.234465	0.00405126
Psma2	-0.234465	0.00627683
Oat	-0.234465	0.0075026
Ugp2	-0.234465	0.0441209
Suclg1	-0.234465	0.0496858
Ufc1	-0.234465	0.0537561
Prdx3	-0.234465	0.0541844
Pgk1	-0.234465	0.0638378
Gla	-0.234465	0.0989882
Copb1	-0.234465	0.12534
Plpbp	-0.234465	0.127023
Asna1	-0.234465	0.142567
Gba	-0.234465	0.172428
Gaa	-0.234465	0.175555
Aip	-0.234465	0.176386
Asah1	-0.234465	0.176501
Coro2a	-0.234465	0.177267
Pde4dip	-0.234465	0.185045
Arf4	-0.234465	0.191724
Plxna1	-0.234465	0.202267
Mtpn	-0.234465	0.211152
Ube2k	-0.234465	0.235391
Tssk4	-0.234465	0.242209
Prkcd	-0.234465	0.247406
Mrpl12	-0.234465	0.277661
Sirt2	-0.234465	0.282289
Rpl7	-0.234465	0.296046
Plin3	-0.234465	0.349902
Rab1b	-0.234465	0.388188
Ppp1r18	-0.234465	0.39325
Lima1	-0.234465	0.423313
Rsu1	-0.234465	0.442779
Copz1	-0.234465	0.555549
Blvrb	-0.251539	0.0129866
Vps52	-0.251539	0.0186812
Ptpn1	-0.251539	0.0967613
Dync1i2	-0.251539	0.098467
Nceh1	-0.251539	0.175722
Glrx	-0.251539	0.195855
Glb1	-0.251539	0.20754
Gstm1	-0.251539	0.222667
Was	-0.251539	0.295209
Prrc1	-0.251539	0.296485
Dld	-0.251539	0.355301
Ppp1ca	-0.251539	0.36716
Mtatp8	-0.251539	0.435214
Crip1	-0.251539	0.450062
Sar1a	-0.251539	0.497811
Tmem167a	-0.251539	0.666468
Fadd	-0.251539	0.819493
Tln1	-0.268817	0.0225119
Akr1b8	-0.268817	0.0325527
Eif4b	-0.268817	0.032585
Gltp	-0.268817	0.059761
Hist1h1e	-0.268817	0.0728818
Vamp3	-0.268817	0.0742523
Eno1	-0.268817	0.0943379
Emb	-0.268817	0.10985
Hint1	-0.268817	0.145296
Cuta	-0.268817	0.162372
Ndufs5	-0.268817	0.173435
Psmb6	-0.268817	0.176057
Puf60	-0.268817	0.225281
Snx12	-0.268817	0.225931
Hcls1	-0.268817	0.247946
Pdia4	-0.268817	0.281755
Hsp90b1	-0.268817	0.293164
Tagln2	-0.268817	0.300677
Asph	-0.268817	0.305701
Atp5j2	-0.268817	0.330907
Ranbp1	-0.268817	0.382266
Faim	-0.268817	0.397474
Glud1	-0.268817	0.398265
C3	-0.268817	0.436595
Rplp1	-0.268817	0.472011
Carhsp1	-0.268817	0.479112
Aprt	-0.268817	0.480521
Nedd8	-0.268817	0.551363
Pdcd10	-0.268817	0.56011
Ola1	-0.268817	0.56467
Stmn2	-0.268817	0.701575
G3bp1	-0.268817	0.805947
Idi1	-0.268817	0.936625
Flnc	-0.268817	1.53217
Copa	-0.286304	0.00909711
Cap1	-0.286304	0.0237096
Hes3	-0.286304	0.0484736
Hexb	-0.286304	0.0929344
Ptges3	-0.286304	0.112212
Ddt	-0.286304	0.174477
Sfpq	-0.286304	0.192365
Skp1	-0.286304	0.20391
Ppp1r9b	-0.286304	0.24168
Rrbp1	-0.286304	0.312057
Rpl15	-0.286304	0.441025
Acat1	-0.286304	0.468591
Sh3bgrl	-0.286304	0.47085
Dnase2	-0.286304	0.485138
Fubp1	-0.286304	0.600588
Gtdc1	-0.286304	0.612904
Actn4	-0.304006	0.0723469
Uap1l1	-0.304006	0.112789
Hist1h1b	-0.304006	0.164797
Gdi2	-0.304006	0.193707
Nutf2	-0.304006	0.232679
Rps2	-0.304006	0.246209
Mtco2	-0.304006	0.25946
Hprt1	-0.304006	0.273597
Prrc2c	-0.304006	0.35569
Rps27	-0.304006	0.358856
Tmx1	-0.304006	0.516991
Ssr4	-0.304006	0.588623
Hmgb2	-0.304006	1.08217
Ctsd	-0.321928	0.0220196
Ctsa	-0.321928	0.0589092
Hist1h1d	-0.321928	0.0739556
Hist1h3b	-0.321928	0.0828964
Psma1	-0.321928	0.0918567
Csf1r	-0.321928	0.125918
Eif3k	-0.321928	0.169327
Nup58	-0.321928	0.175255
Rpl3	-0.321928	0.256455
Pld3	-0.321928	0.262468
Gmfg	-0.321928	0.262564
Actbl2	-0.321928	0.281091
Etfb	-0.321928	0.306664
Akt1s1	-0.321928	0.382435
Ube2v1	-0.321928	0.402113
Purb	-0.321928	0.405578
Timm8a1	-0.321928	0.407123
Camk1	-0.321928	0.415619
Ezr	-0.321928	0.548045
Atp5j	-0.321928	0.562452
Txnl1	-0.321928	0.738792
Fkbp15	-0.321928	0.825222
Acp1	-0.321928	0.890952
Qki	-0.321928	0.924406
Dab2	-0.321928	1.00383
Eif4a3	-0.340075	0.0325124
Psma5	-0.340075	0.105931
Hnrnpu	-0.340075	0.118752
Tmbim6	-0.340075	0.131522
Rbbp4	-0.340075	0.178288
Psph	-0.340075	0.243422
Rpl10	-0.340075	0.290121
Calu	-0.340075	0.334054
Ndufb8	-0.340075	0.34754
Nsf	-0.340075	0.420324
Rnaset2a	-0.340075	0.482867
Uba1	-0.340075	0.484692
Nes	-0.340075	0.487759
Hyou1	-0.340075	0.490182
Mccc2	-0.340075	0.527001
Rpl32	-0.340075	0.587699
Ddi2	-0.340075	0.708924
Snx8	-0.340075	1.00217
Adssl1	-0.340075	1.0124
Uqcr10	-0.340075	1.16895
Vta1	-0.340075	1.24918
Got2	-0.358454	0.00250702
Dhodh	-0.358454	0.0283123
Pgp	-0.358454	0.038196
Ctss	-0.358454	0.088452
Fmr1	-0.358454	0.129459
Sub1	-0.358454	0.203937
Stap1	-0.358454	0.224708
Mtap	-0.358454	0.269297
Tbca	-0.358454	0.277578
Dhx15	-0.358454	0.293099
Snx33	-0.358454	0.334277
Psmc6	-0.358454	0.38509
Parp1	-0.358454	0.443986
Syngr1	-0.358454	0.455872
Ubxn1	-0.358454	0.473696
Ppp1cb	-0.358454	0.705097
Washc4	-0.358454	0.810661
Ppp3ca	-0.37707	0.0268241
Capg	-0.37707	0.0297252
Dlst	-0.37707	0.0338747
Mdh2	-0.37707	0.0841924
Atox1	-0.37707	0.241628
Rpl34	-0.37707	0.253988
Ppp1r12c	-0.37707	0.263045
Il16	-0.37707	0.269682
Ddx6	-0.37707	0.310606
Gripap1	-0.37707	0.355245
Arl1	-0.37707	0.392997
Uchl5	-0.37707	0.418486
Map4	-0.37707	0.509192
Psmd7	-0.37707	0.552329
Elavl1	-0.37707	0.580527
Ddx3x	-0.395929	0.147493
Acaa1a	-0.395929	0.155455
Lrrfip1	-0.395929	0.167906
Stt3b	-0.395929	0.184327
Fyb1	-0.395929	0.255792
Bid	-0.395929	0.323221
Ssb	-0.395929	0.369718
Cd200r1	-0.395929	0.404719
Rpl13a	-0.395929	0.422529
Ptpa	-0.395929	0.434169
S100a1	-0.395929	0.473851
Vim	-0.395929	0.566509
Gtf2a1	-0.415037	0.0450386
Eif3f	-0.415037	0.0458106
Abcf1	-0.415037	0.219483
Eif5a	-0.415037	0.328438
Rpl4	-0.415037	0.367643
Smpdl3a	-0.415037	0.383476
Sdc3	-0.415037	0.49926
Ppp1r7	-0.415037	0.555635
Srsf6	-0.415037	0.614306
Ebp	-0.415037	0.623569
Psmb4	-0.415037	0.668415
Brk1	-0.415037	0.754991
Pdcd6ip	-0.415037	0.846277
Hspa4	-0.434403	0.00881558
Ncf2	-0.434403	0.0289154
Pir	-0.434403	0.0349644
Aldoa	-0.434403	0.0794692
Tkt	-0.434403	0.0872217
Psmb3	-0.434403	0.09012
Renbp	-0.434403	0.0909277
Mrps27	-0.434403	0.230895
Vps28	-0.434403	0.24259
Vat1	-0.434403	0.257705
Caprin1	-0.434403	0.305291
Banf1	-0.434403	0.317141
Rasa4	-0.434403	0.348235
Trim28	-0.434403	0.416953
Psap	-0.434403	0.460329
Washc2	-0.434403	0.500589
Pcna	-0.434403	0.541831
Farsb	-0.434403	0.646084
Ier3ip1	-0.434403	1.20472
Gpi	-0.454032	0.0158279
Prmt1	-0.454032	0.12922
Bub3	-0.454032	0.145313
Snap23	-0.454032	0.215913
JPT1	-0.454032	0.217596
Ppp1r12a	-0.454032	0.316432
Kars	-0.454032	0.36802
Upf1	-0.454032	0.449035
Snx6	-0.454032	0.737791
Psmb7	-0.454032	0.756808
Shtn1	-0.454032	1.01127
S100a6	-0.473931	0.200029
Hnrnpul1	-0.473931	0.209815
Usp14	-0.473931	0.224441
Pabpc1	-0.473931	0.2366
Rp2	-0.473931	0.236988
Caskin2	-0.473931	0.286588
Atp5f1	-0.473931	0.341885
Tpt1	-0.473931	0.393677
Pltp	-0.473931	0.462447
Pccb	-0.473931	0.610802
Ptms	-0.473931	0.654397
Lipa	-0.473931	1.10858
F13a1	-0.494109	2.08466e-05
Uvrag	-0.494109	0.136634
Nudcd3	-0.494109	0.136634
Psmb1	-0.494109	0.147909
Rpl30	-0.494109	0.193965
Babam2	-0.494109	0.222571
Sucla2	-0.494109	0.342562
Pafah1b3	-0.494109	0.369572
Pfdn1	-0.494109	0.43261
Mov10	-0.494109	0.444055
Pgam5	-0.494109	0.463862
Ptma	-0.494109	0.466776
Sugt1	-0.494109	0.485745
Coro1c	-0.494109	0.50879
Cd68	-0.494109	0.516284
Acacb	-0.494109	0.550968
Ptbp2	-0.494109	1.48752
Adh5	-0.514573	0.0177663
Rap1b	-0.514573	0.217223
S100a13	-0.514573	0.288769
Srsf2	-0.514573	0.375697
Nudt5	-0.514573	0.448445
Sh3bgrl3	-0.514573	0.470398
Nipsnap3b	-0.514573	0.496341
Polr2i	-0.514573	0.524371
Dapk1	-0.514573	0.555943
Rpp30	-0.535332	0.0671256
Nek5	-0.535332	0.193527
Acot7	-0.535332	0.294506
Eif4a2	-0.535332	0.396113
Snx9	-0.535332	0.425822
Lgmn	-0.535332	0.540811
Rev1	-0.535332	0.569388
Dek	-0.535332	0.612425
Cyb5r3	-0.535332	0.622015
Ppp3r1	-0.556393	0.114862
Dpp7	-0.556393	0.122055
Ppp2r2a	-0.556393	0.126489
Rfc1	-0.556393	0.178438
Akr1a1	-0.556393	0.444218
Akr1e2	-0.556393	0.449283
Litaf	-0.556393	0.516625
Pcca	-0.556393	0.743378
Pc	-0.556393	0.847201
Srsf10	-0.556393	0.893248
Isyna1	-0.556393	1.1387
Gmpr2	-0.577767	0.0169477
Cox7a2	-0.577767	0.0907634
Pla2g15	-0.577767	0.107216
Eif6	-0.577767	0.131511
Tubb5	-0.577767	0.153448
Alkbh6	-0.577767	0.246018
Sept7	-0.577767	0.326295
Prdx4	-0.577767	0.372907
Arhgef1	-0.577767	0.496179
Myo1e	-0.577767	0.572223
Bckdha	-0.577767	0.888271
Gusb	-0.599462	0.0196598
Pycr2	-0.599462	0.0761873
Pdcd5	-0.599462	0.489727
Scarb2	-0.599462	0.494313
Psma3	-0.621488	0.224889
Dnaja3	-0.621488	0.30288
Rpa3	-0.621488	0.303073
Pum3	-0.621488	0.40345
Rps28	-0.621488	0.620858
Tma7	-0.621488	0.648668
Gsr	-0.621488	0.656438
Drg1	-0.643856	0.106323
Washc5	-0.643856	0.330726
Mob4	-0.643856	0.437488
Pcbp1	-0.643856	0.521822
Galns	-0.666576	0.0668722
Manba	-0.666576	0.1016
	-0.666576	0.114229
Arhgap17	-0.666576	0.544482
Txnrd1	-0.68966	0.0700235
Ptbp3	-0.68966	0.296214
Osbpl8	-0.68966	0.34526
Cd9	-0.68966	0.349515
	-0.68966	0.36276
Psmd13	-0.68966	0.402304
Sptbn1	-0.68966	0.50531
Dbt	-0.68966	0.675635
Psmd3	-0.68966	1.13758
Got1	-0.713119	0.0964136
Crk	-0.713119	0.487133
Inpp5d	-0.736966	0.133406
Atp6v0a1	-0.736966	0.227835
Eea1	-0.736966	0.351458
Syncrip	-0.736966	0.472097
Iah1	-0.736966	0.515283
Rae1	-0.736966	0.724122
Oxct1	-0.761213	0.315006
Pa2g4	-0.761213	2.58071
Eif3d	-0.785875	0.270621
Aox3	-0.785875	0.481815
Sept11	-0.785875	0.628714
Acaca	-0.785875	0.758361
Pdlim2	-0.785875	1.54138
Mccc1	-0.810966	0.828288
Erh	-0.836501	0.323802
Luc7l2	-0.836501	0.335789
Krt16	-0.836501	0.356664
Eif4e	-0.836501	0.617785
Ptpn18	-0.836501	1.61347
Pdap1	-0.862496	0.370478
Ncl	-0.862496	0.889148
Ppp6c	-0.888969	0.337679
Bloc1s2	-0.888969	0.490718
Mcm3	-0.888969	0.498393
Sf3b3	-0.888969	0.619876
Tmem106a	-0.888969	1.28109
H2afx	-0.915936	0.0219624
Ndufa6	-0.915936	0.794038
Eif3c	-0.915936	1.0271
Paip1	-0.943416	0.406599
Hao2	-0.943416	1.0809
Pds5b	-0.943416	1.0809
Marf1	-0.943416	1.0809
Mrps31	-0.943416	1.0809
Sgta	-0.971431	1.30345
Fat2	-1	1.11434
Ndufs8	-1	1.33847
Cyfip1	-1.02915	0.458326
Supt16h	-1.05889	0.784719
Mrpl40	-1.05889	1.53606
Hist1h1a	-1.08927	0.249263
Mrps36	-1.08927	0.347737
Arf5	-1.08927	0.428252
Sarnp	-1.08927	0.749185
Pfdn6	-1.18442	0.547475
Cbx3	-1.25154	0.619801
Snd1	-1.25154	0.88156
Naxe	-1.32193	0.00163254
Dynlrb1	-1.32193	1.19313
Krt17	-1.39593	0.378583
Pdhb	-1.4344	1.40859
Adss	-1.47393	0.135573
Atp5d	-1.47393	0.550357
Vps26b	-1.51457	0.483101
Naca	-1.51457	0.844309
Ubqln1	-1.51457	0.855189
Cops4	-1.64386	1.1994
Ruvbl1	-1.68966	0.206319
Glod4	-1.73697	0.302344
Myl9	-1.73697	0.398843
Ndufs1	-1.73697	0.509497
Bola2	-1.73697	0.736
Cd63	-1.78588	0.477548
Dpm3	-1.88897	0.591584
Nup54	-2	0.561595
Pygb	-2.05889	0.363119
Lman1	-2.12029	0.24526
Tom1	-2.12029	0.80251
Srsf5	-2.18442	1.12541
Pdha1	-2.18442	2.28291
U2af2	-2.32193	1.22225
Uggt1	-2.39593	0.262524
Casp1	-2.47393	0.455742
Sept9	-2.55639	0.558844
Exosc4	-2.55639	0.568718
Eif3b	-2.55639	0.569222
Krt6a	-2.64386	0.305224
Vcl	-2.64386	0.496311
Rad23a	-2.64386	0.670067
Vkorc1	-3.32193	0.20471
Dlat	-3.32193	1.40079
Pdhx	-3.47393	1.61604
Nono	-3.8365	0.689124
S100a9	-3.8365	0.764828
Krt76	-4.64386	0.507836
Tuba1c	#NUM!	#NUM!
Tuba1b	#NUM!	#NUM!
Krt13	#NUM!	#NUM!
Rps27l	#NUM!	#NUM!
Osbpl5	#NUM!	#NUM!
Ehd3	#NUM!	#NUM!
Isoc2a	#NUM!	#NUM!
Slc9a9	#NUM!	#NUM!
Rbm3	#NUM!	#NUM!
Isg20l2	#NUM!	#NUM!
Glul	#NUM!	#NUM!
Cnrip1	#NUM!	#NUM!
Mavs	#NUM!	#NUM!
Pbdc1	#NUM!	#NUM!
Ndufa10	#NUM!	#NUM!
Cd300a	#NUM!	#NUM!
Rbm8a	#NUM!	#NUM!
Prpf19	#NUM!	#NUM!
Epdr1	#NUM!	#NUM!
Uba2	#NUM!	#NUM!
Echs1	#NUM!	#NUM!
Slc25a22	#NUM!	#NUM!
Rwdd1	#NUM!	#NUM!
Jpt2	#NUM!	#NUM!
Ncf4	#NUM!	#NUM!
Ccdc58	#NUM!	#NUM!
Plek	#NUM!	#NUM!
Son	#NUM!	#NUM!
