# Supplementary material for: The C-type lectin receptor DCIR senses galactose-terminated N-glycans on LRP1 to regulate myeloid cell function
Source: Research Square preprint supplement (doi:10.21203/rs.3.rs-7879894/v1), 2025-11-11
Supplement: Supplementary file 4 [file 6513dc090b922804f8a5e748.xlsx]

## Sheet: Table S4
Table S5. Crystallographic data collection and refinement statistics. Values in parentheses relates to the highest resolution shell.
Data collection
PDB id	9QHA
BeamLine	ESRF BEAMLINE ID30B
spacegroup	P65
Unit cell paramaters	a=b= 37.02 Å; c=477.65Å; α=β=90°; γ =120°
wavelength	0.87313
Resolution (Å)	79.68 – 2.20 (2.33-2.20)
Total number of observations	268488 (44356)
Total unique reflections	18723 (3036)
Completeness	100% (99.8%)
Rmerge	0.147 (1.686)
CC(1/2)	0.999 (0.92)
I/σ(I)	12.89 (1.80)
Multiplicity	14.34 (14.61)
Refinement
Resolution ( Å)	29.74 – 2.20
Number of reflections	18448
Rfree test set	1870 reflections (10.14%)
Rwork / Rfree values	0.2299/0.2596
No. of non-H atoms	2636
Wilson B-factor (Å2)	40.19
Average B, all atoms (Å2)	68.00
R.m.s. deviation
Bond lengths (Å)	0.004
Bond angles (°)	0.738
Ramachandran plot (%)
Favored	97.24
Allowed	2.76
Outliers	0.0
