# Supplementary material for: The C-type lectin receptor DCIR senses galactose-terminated N-glycans on LRP1 to regulate myeloid cell function
Source: Research Square preprint supplement (doi:10.21203/rs.3.rs-7879894/v1), 2025-11-11
Supplement: Supplementary file 7 [file c58faeded207f455780a624e.xlsx]

## Sheet: Table S4
Table S4. Kinetic parameters resulting from SPR analysis using the kinetic 1:1 interaction model analysis for the interaction of hDCIR with different BSA-derived neoglycoconjugate. KD results from the ratio of koff and kon.
	kon	koff	KDapp
Type of glycan linked to BSA	M-1.s-1	s-1	µM
A2	70.64 ± 0.21	2.95 (± 0.01) x 10-4	4.17 ± 0.25
A2G2	75.80 ± 0.07	6.74 (± 0.03) x 10-5	0.89 ± 0.01
A2G2Ga2	77.69 ± 0.05	4.33 (± 0.02) x 10-5	0.56 ± 0.01
